# Continuum approximations for lattice-free multi-species models of collective cell migration

Oleksii M Matsiaka<sup>1</sup>, Catherine J Penington<sup>1</sup>, Ruth E Baker<sup>2</sup>,  
\*Matthew J Simpson<sup>1</sup>

<sup>1</sup> *School of Mathematical Sciences, Queensland University of Technology (QUT)  
Brisbane, Queensland, Australia.*

<sup>2</sup> *Mathematical Institute, University of Oxford, Radcliffe Observatory Quarter,  
Woodstock Road, Oxford, United Kingdom.*

---

## Abstract

Cell migration within tissues involves the interaction of many cells from distinct subpopulations. In this work, we present a discrete model of collective cell migration where the motion of individual cells is driven by random forces, short range repulsion forces to mimic crowding, and longer range attraction forces to mimic adhesion. This discrete model can be used to simulate a population of cells that is composed of  $K \geq 1$  distinct subpopulations. To analyse the discrete model we formulate a hierarchy of moment equations that describe the spatial evolution of the density of agents, pairs of agents, triplets of agents, and so forth. To solve the hierarchy of moment equations we introduce two forms of closure: (i) the mean field approximation, which effectively assumes that the distributions of individual agents are independent; and (ii) a moment dynamics description that is based on the Kirkwood superposition approximation. The moment dynamics description provides an approximate way of incorporating spatial patterns, such as agent clustering, into the continuum description. Comparing the performance of the two continuum descriptions confirms that both perform well when adhesive forces are sufficiently weak. In contrast, the moment dynamics description outperforms the mean field model when adhesive forces are sufficiently large. This is a first attempt to provide an accurate continuum description of a lattice-free, multi-species model of collective cell migration.

*Key words:* Cell migration; mean field approximation; moment dynamics approximation; Kirkwood superposition approximation.

---

# 1 Introduction

*In vivo* cell migration involves many different cell types interacting with each other. For example, tumour invasion involves malignant cancer cells moving through normal surrounding tissues (Weinberg, 2009). Interactions between different cell types are also captured in certain *in vitro* experiments, such as the migration of malignant melanoma cells, which is thought to be enhanced when these cells are moving amongst skin cells (Eves et al., 2003). Multiple species of cells can also be created in experiments where some subpopulation of cells, amongst an otherwise identical subpopulation, are labelled and tracked over time (Simpson et al. 2006; Simpson et al., 2007). While some mathematical models explicitly account for interactions between different subpopulations of cells (Painter and Sherratt, 2003), most mathematical models deal with a single population of cells only (Sherratt and Murray, 1990; Maini et al., 2004).

A common approach to modelling cell migration is to use a lattice-based random walk model. This approach captures details of the motion of individual cells, which is attractive because this kind of information can be linked to time lapse images from experiments. The continuum-limit description of such a lattice-based model can also be used to study the group behaviour. Although some previous lattice-based models account for interactions between different types of cells (Simpson et al., 2009; Penington et al., 2011), these lattice-based models are unrealistic because real cells do not move on regular lattice-based structures. Other limitations of lattice-based models include restrictions on cell size. For example, the diameter of a typical melanoma cell is approximately 18  $\mu\text{m}$  (Treloar et al., 2013) whereas the diameter of a typical skin cell is approximately 25  $\mu\text{m}$  (Simpson et al., 2013). In a model with both types of cells present, it is not possible to accommodate these differences in cell size

---

\* Corresponding author

*Email address:* `matthew.simpson@qut.edu.au`, *Telephone* + 617 3138 5241, *Fax* + 617 3138 2310 (\*Matthew J Simpson<sup>1</sup>).

if we use a standard lattice-based approach where each cell occupies a single lattice site (Binder and Simpson, 2016).

To address these limitations, we define a lattice-free model that can be used to describe the migration of a population of cells that is composed of many potentially distinct subpopulations. We adopt a modelling framework that is an extension of previous approaches by Newman and Grima (2004) and Middleton and co-workers (2014). The work by Newman and Grima considered a stochastic model of individual cell migration, with chemotactic effects, and they described the continuum limit using a Langevin formulation. The work of Newman and Grima (2004) was then extended by Middleton and co-workers (2014) who also considered a stochastic model of individual cell migration in terms of a Langevin formulation, however they considered both a traditional mean field continuum approximation as well as a more sophisticated moment closure continuum approximation that accounts for the spatial and temporal dynamics of pairs of agents. A key feature of both these previous models is that they are appropriate for studying the collective migration of a single populations of cells. However, many practical problems in development and disease progression involves multiple interacting subpopulations of cells. Therefore, the main aim of the current study is to develop a discrete model of collective migration where the total population of cells consists of an arbitrary number of interacting subpopulations. Our discrete model incorporates random cell motility, adhesion between cells and finite size effects (crowding). We allow for differences in cell size, cell motility and cell adhesion between the different subpopulations. In addition to producing stochastic realisations of the discrete model, we also analyse the continuum limit using both a standard mean field approximation and a more sophisticated moment dynamics approximation. Comparing averaged behaviour from the discrete simulations with the solution of the continuum models confirms that the mean field approach can be inaccurate when adhesion is sufficiently strong. This is important because almost all mathematical models of collective cell migration invoke the mean field approximation (Sherratt and Murray, 1990; Painter and Sherratt, 2003; Maini et al., 2004).

This manuscript is organised in the following way. In Section 2 we describe the discrete model. In Section 3.1, we analyse the discrete model, showing how

we can obtain a continuum description of the average behaviour of the discrete model. In particular, we focus on two different continuum descriptions: (i) a mean field approximation; and (ii) a higher-order moment dynamics approximation. Results in Sections 3.2-3.3 compare solutions of both continuum approximations and averaged discrete results for problems involving one and two interacting subpopulations, with additional comparisons presented in the Supplementary Material. In Section 3.4 we investigate how the accuracy of the MFA and KSA approximations depends on the choice of model parameters. Finally, in Section 4, we summarise our work and highlight opportunities for future investigation.

## 2 Discrete model

We consider a population of  $N$  cells that is composed of an arbitrary number of subpopulations,  $K \geq 1$ . Illustrative schematics showing interactions between individuals in a population with  $K = 1$  and  $K = 2$  subpopulations are given in Figure 1(a)-(b), respectively.

We begin by assuming that each individual cell is a point mass and that its movement can be described by an equation of motion. For simplicity, from this point on, we restrict our attention to a one-dimensional geometry, and in Section 4 we discuss how the framework can be adapted to higher dimensions. To begin describing the collective motion, we assume that the motion of each cell is governed by Newton's second law,

$$m_i \frac{d^2 x_i}{dt^2} = \mathcal{V}_i + \sum_{j \neq i} R_{ij} + \zeta_i, \quad i = 1, \dots, N, \quad (2.1)$$

where  $x_i$  is the position of the  $i$ th cell,  $m_i$  is its mass, and  $R_{ij}$  is an interaction force between the  $i$ th and  $j$ th cells.  $\mathcal{V}_i$  is the viscous force between the cell and the surrounding medium, and  $\zeta_i$  is the stochastic force associated with random Brownian motion. According to Stokes' law, the viscous force on a small spherical particle moving in a viscous fluid is given by

$$\mathcal{V}_i = -\mu \frac{dx_i}{dt}, \quad (2.2)$$

where  $\mu > 0$  is the drag coefficient. If we neglect inertial forces and invoke

88 Stokes' law (Middleton et al., 2014), we arrive at a system of Langevin stochastic  
 89 differential equations (SDEs) given by

$$\frac{dx_i}{dt} = \sum_{j \neq i} F_{ij} + \xi_i, \quad i = 1, \dots, N, \quad (2.3)$$

90 where  $R_{ij} = \mu F_{ij}$  and  $\zeta_i = \mu \xi_i$ .

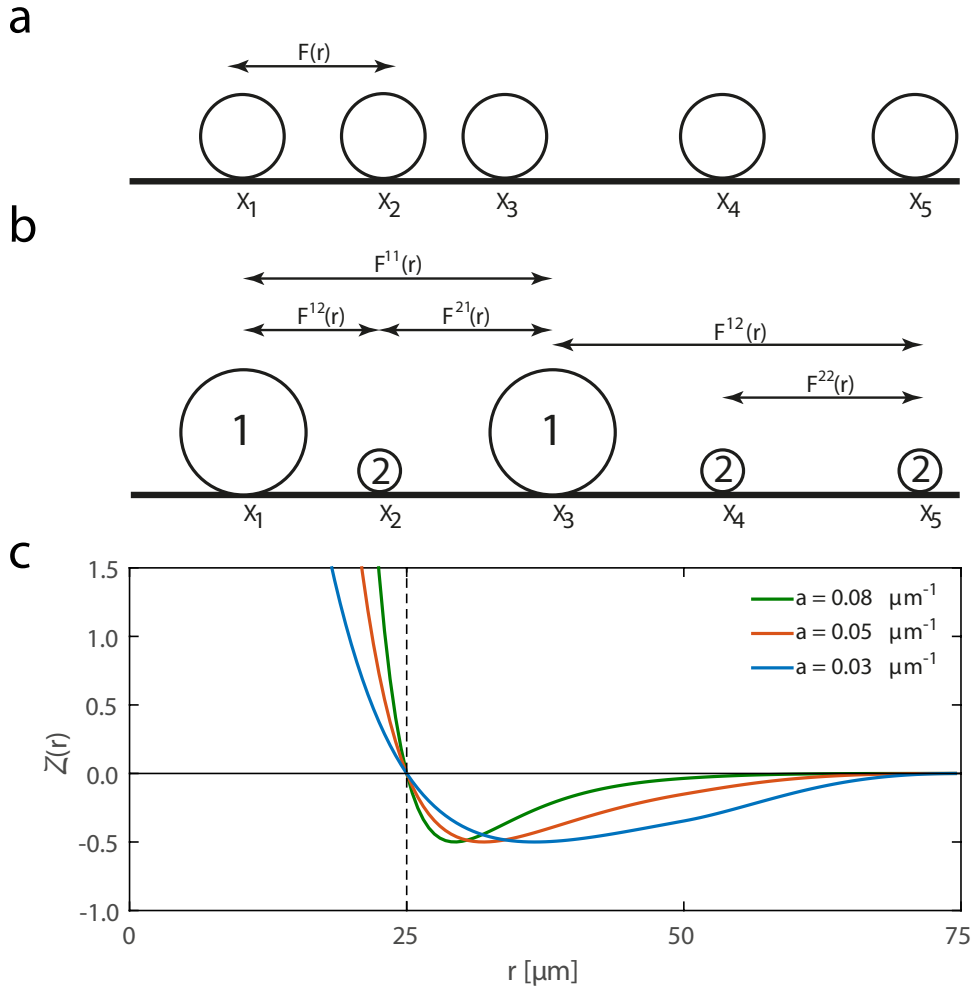

Fig. 1. (a)-(b) Representative plot of single- and multi-species systems of cells, respectively. In (a) we show the intraspecies force,  $F(r)$ , and in (b) we show both intraspecies forces,  $F^{11}(r)$  and  $F^{22}(r)$ , and interspecies forces,  $F^{12}(r)$  and  $F^{21}(r)$ . Here,  $r$  is the distance between cells. (c) Dimensionless force law function  $Z(r)$ , given by Equation (2.5), for various values of  $a$ . Here,  $\delta = 25 \mu\text{m}$  corresponds to a typical cell diameter.

91 In summary, according to Equation (2.3), the collective migration of cells is de-  
 92 termined by a balance between cell-to-cell interactions (short-range crowding

and longer range adhesion), stochastic forces, and viscous forces. Collective cell migration that is driven by unbiased stochastic forces is thought to be relevant in many applications, such as collective cell spreading in many single-species *in vitro* experiments (Simpson et al., 2013). Therefore, we focus on unbiased stochastic forces by sampling  $\xi_i$  from a Gaussian distribution with zero mean and zero auto-correlation (Middleton et al. 2014).

It is biologically reasonable to model the interaction forces between cells,  $F_{ij}$ , to have different amplitudes for subpopulations of cells. This is relevant if we wish to specify different adhesion forces between different subpopulations (Steinberg, 1996). For simplicity, we assume  $F_{ij} = F_{ji}$ , and we specify the interaction force to be

$$F_{ij} = f_0 \mathcal{Z}(r) \text{sgn}(x_i - x_j), \quad (2.4)$$

where  $f_0$  is the dimensional amplitude of the interaction force,  $\mathcal{Z}(r)$  is the dimensionless force law function that depends on the separation distance, and  $r = |x_i - x_j|$ . The function  $\text{sgn}$  is the *signum* function. The particular choice of  $\mathcal{Z}(r)$  depends on phenomenological cellular behaviour we wish to model. Several force laws have been suggested, including a linear spring model (Murray et al., 2009) and non-linear force laws such as Morse (Middleton et al., 2014) or Lennard-Jones (Jeon et al., 2010) potentials. In this work we adopt a modified Morse potential force law, so that

$$\mathcal{Z}(r) = \begin{cases} 2 \left( \exp(-2a(r - \delta)) - \exp(-a(r - \delta)) \right), & r < 2\delta, \\ 2 \left( \exp(-2a(r - \delta)) - \exp(-a(r - \delta)) \right) g(r), & 2\delta \leq r \leq 3\delta, \\ 0, & r > 3\delta, \end{cases} \quad (2.5)$$

where  $a$  is a parameter that controls the shape of the force function, as illustrated in Figure 1(c), and  $\delta$  is the cell diameter. The distance  $r = \delta$  corresponds to the case where two cells are just in contact with each other. In this model we have  $\mathcal{Z}(\delta) = 0$  and  $\mathcal{Z}(r) = 0$  for  $r > 3\delta$ . Introducing the cell diameter  $\delta$  in Equation (2.5) allows us to more realistically model the behaviour of multi-species populations of cells with different diameters.

Equation (2.5) incorporates the Tersoff cut-off function,  $g(r)$  (Tersoff, 1988),

119 to capture a finite interaction range between cells. This function is given by

$$g(r) = \frac{1}{2} \left( 1 - \sin \left( \pi \frac{2r - \delta}{2\delta} \right) \right). \quad (2.6)$$

120 The interaction range has been chosen to be  $3\delta$  (Srinivas et al., 2004).

121 A representative plot of  $\mathcal{Z}(r)$  for different values of  $a$  is given in Figure 1(c).  
 122 The force function consists of two regimes: short-range repulsion and longer  
 123 range attraction. The repulsive term mimics crowding effects while the attrac-  
 124 tive tail models adhesion. While all of the results presented in this work are  
 125 for this particular choice of force law, it is straightforward to incorporate other  
 126 choices of  $\mathcal{Z}(r)$ .

## 127 3 Results and discussion

### 128 3.1 Mathematical model for an arbitrary number of subpopulations

129 We consider a total population of  $N$  cells that come from  $K$  subpopulations of  
 130 cells, so that  $N = \sum_{k=1}^K n_k$ , where  $n_k$  is the number of cells in subpopulation  
 131  $k$ . This framework can be used to model both situations where each subpopu-  
 132 lation is distinct (Eves et al. 2003) and situations where each subpopulation is  
 133 composed of tagged, but otherwise identical cells (Simpson et al. 2006; Simp-  
 134 son et al. 2007). In addition, these distinct subpopulations may differ in many  
 135 ways, such as differences in diameter, motility rates, or interaction forces and  
 136 they can be arbitrarily arranged in space.

137 We define the one-cell probability density function (PDF),  $P_1^i(x, t)$ , as the  
 138 probability that the position of cell  $i$  is in the small neighbourhood  $[x, x + dx]$   
 139 at time  $t$ . Similarly, we define the two-cell PDF,  $P_2^{ij}(x, y, t)$ , as the probability  
 140 that cells  $i$  and  $j$  lie in  $[x, x + dx]$  and  $[y, y + dy]$ , respectively, at time  $t$ . At  
 141 present, we do not specify which of the subpopulations these cells belong to.

142 Given that the motile behaviour of cells is governed by Equation (2.3), we can

143 relate the PDFs to the position of cells as follows (van Kampen, 1975),

$$P_1^i(x, t) = \langle \delta^{(N)}(x - x_i(t)) \rangle, \quad (3.1)$$

$$P_2^{ij}(x, y, t) = \langle \delta^{(N)}(x - x_i(t)) \delta^{(N)}(y - y_j(t)) \rangle, \quad (3.2)$$

144 where  $x_i(t)$  and  $y_j(t)$  are the positions of cells given by Equation (2.3). The  
145 angled brackets indicate an average over a sufficiently large number of identi-  
146 cally prepared initial conditions and a sufficiently large number of realisations  
147 of the stochastic force. Further background explanation about Equations (3.1)  
148 and (3.2) is given in the Supplementary Material.

149 The time evolution of  $P_1^i(x, t)$  is governed by a Fokker-Planck equation (Sup-  
150 plementary Material),

$$\frac{\partial P_1^i(x, t)}{\partial t} = D \Delta P_1^i(x, t) - \nabla \cdot (f_i P_1^i(x, t)), \quad (3.3)$$

151 which describes the motion of particles under the influence of random forces,  
152 proportional to the diffusivity,  $D$ , and directed drift forces,  $f_i$ . The force  $f_i$   
153 acting on cell  $i$  in subpopulation  $l$  may be expressed as the sum of two types  
154 of forces: intraspecies forces exerted by other members of subpopulation  $l$ , and  
155 interspecies forces exerted by cells from all other subpopulations, giving

$$f_i = \sum_{j \neq i} F_{ij}^{ll} + \sum_{k \neq l} \sum_{j \in k} F_{ij}^{lk}. \quad (3.4)$$

156 Combining Equations (3.1), (3.3) and (3.4), and taking the convolution of the  
157 interaction force and a  $\delta$ -function centred at  $y_j$ , we obtain

$$\begin{aligned} \frac{\partial P_1^i(x, t)}{\partial t} = & D \Delta P_1^i(x, t) \\ & - \nabla \cdot \left\langle \sum_{j \in l, j \neq i} \int_{\Omega} F_{ij}^{ll}(x_i - y) \delta(x - x_i(t)) \delta(y - y_j(t)) dy \right\rangle \\ & - \sum_{k \neq l}^K \nabla \cdot \left\langle \sum_{j \in k} \int_{\Omega} F_{ij}^{lk}(x_i - y) \delta(x - x_i(t)) \delta(y - y_j(t)) dy \right\rangle, \end{aligned} \quad (3.5)$$

158 where  $\Omega$  denotes the domain. The second and third terms on the right hand  
159 side of Equation (3.5) are advection terms that incorporate intraspecies and  
160 interspecies forces, respectively. Combining Equations (3.2) and (3.5), and



interchanging summation and integration, we obtain

$$\begin{aligned} \frac{\partial P_1^i(x, t)}{\partial t} = & D\Delta P_1^i(x, t) - \nabla \int_{\Omega} F^{ll}(x - y) \sum_{j \in l, j \neq i} P_2^{ij}(x, y, t) dy \\ & - \sum_{k \neq l}^K \nabla \int_{\Omega} F^{lk}(x - y) \sum_{j \in k} P_2^{ij}(x, y, t) dy, \end{aligned} \quad (3.6)$$

where, from this point forward, we drop the subscript  $i$  on  $x_i$ .

To make the transition from individual level behaviour in a discrete simulation to the population level dynamics, we define the following quantities,

$$p_1^l(x, t) = \frac{1}{n_l} \sum_{i \in \mathcal{L}} P_1^i(x, t), \quad (3.7)$$

$$p_2^{ll}(x, y, t) = \frac{1}{n_l(n_l - 1)} \sum_{i \in \mathcal{L}} \sum_{j \in \mathcal{L}, j \neq i} P_2^{ij}(x, y, t), \quad (3.8)$$

$$p_2^{lm}(x, y, t) = \frac{1}{n_l n_m} \sum_{i \in \mathcal{L}} \sum_{j \in \mathcal{L}} P_2^{ij}(x, y, t), \quad l \neq m, \quad (3.9)$$

where  $p_1^l(x, t)$  is the normalised one-cell density distribution of subpopulation  $l$ ,  $p_2^{ll}(x, y, t)$  is the density-density correlation function that captures intraspecies correlations, and  $p_2^{lm}(x, y, t)$  is the density-density correlation function that captures interspecies correlations.

To proceed, we sum over the index  $i$  in Equation (3.6) and apply the definitions given in Equations (3.7)-(3.9). We repeat this procedure  $K$  times for each subpopulation to yield a system of  $K$  non-linear integro partial differential equations (IPDEs), that can be written as

$$\begin{aligned} \frac{\partial p_1^l(x, t)}{\partial t} = & D\Delta p_1^l(x, t) - (n_l - 1) \nabla \left( \int_{\Omega} F^{ll}(x - y) p_2^{ll}(x, y, t) dy \right) \\ & - \sum_{k \neq l}^K n_k \nabla \left( \int_{\Omega} F^{lk}(x - y) p_2^{lk}(x, y, t) dy \right), \end{aligned} \quad (3.10)$$

for each subpopulation  $l$ . We define the PDF of the total population of  $N$  cells as a weighted sum of the individual distributions,

$$p_1^{\text{total}}(x, t) = \frac{1}{N} \sum_{k=1}^K n_k p_1^k(x, t). \quad (3.11)$$

Equation (3.10) shows that the evolution of  $p_1^l(x, t)$  depends on  $p_2^{ll}(x, y, t)$ . To derive an evolution equation for  $p_2^{ll}(x, y, t)$  we begin with the two-cell Fokker-

177 Planck equation,

$$\frac{\partial P_2^{ij}(x, y, t)}{\partial t} = D\Delta P_2^{ij}(x, y, t) - \frac{\partial}{\partial x} \left( f_i P_2^{ij}(x, y, t) \right) - \frac{\partial}{\partial y} \left( f_j P_2^{ij}(x, y, t) \right), \quad (3.12)$$

178 where cells  $i$  and  $j$  both belong to subpopulation  $l$ . The forces  $f_i$  and  $f_j$ , applied  
179 to cells  $i$  and  $j$ , can be written as the sum of intraspecies and interspecies  
180 forces. For example, the force on an arbitrary cell  $z$  can be written as

$$f_z = \sum_{s \neq z} F_{zs}^{ll} + \sum_{k \neq l}^K \sum_{s \in k} F_{zs}^{lk}. \quad (3.13)$$

181 Adopting the interaction force law, Equation (2.4), using the definition of  
182 the two-cell PDF as given by Equation (3.2), and evaluating the required  
183 convolutions, we can rewrite Equation (3.12) as

$$\begin{aligned}
 \frac{\partial P_2^{ij}(x, y, t)}{\partial t} = & D\Delta P_2^{ij}(x, y, t) \\
 & - \frac{\partial}{\partial x} \left\langle F^l(x - y) \delta(x - x_i(t)) \delta(y - y_j(t)) \right\rangle \\
 & - \frac{\partial}{\partial y} \left\langle F^l(y - x) \delta(x - x_i(t)) \delta(y - y_j(t)) \right\rangle \\
 & - \frac{\partial}{\partial x} \left\langle \sum_{g \in l, g \neq i, j} \int_{\Omega} F^l(x - z) \delta(x - x_i(t)) \delta(y - y_j(t)) \delta(z - z_g(t)) dz \right\rangle \\
 & - \frac{\partial}{\partial y} \left\langle \sum_{g \in l, g \neq i, j} \int_{\Omega} F^l(y - z) \delta(x - x_i(t)) \delta(y - y_j(t)) \delta(z - z_g(t)) dz \right\rangle \\
 & - \sum_{k \neq l}^K \frac{\partial}{\partial x} \left\langle \sum_{g \in k} \int_{\Omega} F^{lk}(x - z) \delta(x - x_i(t)) \delta(y - y_j(t)) \delta(z - z_g(t)) dz \right\rangle \\
 & - \sum_{k \neq l}^K \frac{\partial}{\partial y} \left\langle \sum_{g \in k} \int_{\Omega} F^{lk}(y - z) \delta(x - x_i(t)) \delta(y - y_j(t)) \delta(z - z_g(t)) dz \right\rangle, \tag{3.14}
 \end{aligned}$$

184 where the second and third terms on the right hand side of Equation (3.14) represent interactions between cells  $i$  and  $j$ , the  
 185 fourth and fifth terms on the right hand side of Equation (3.14) represent interactions between cells  $i$  and  $j$  and other cells  
 186 within subpopulation  $l$ , and the sixth and seventh terms on the right hand side of Equation (3.14) represent interactions between  
 187 cells  $i$  and  $j$  and cells in other subpopulations.

188 The three-particle normalised density functions can be defined as,

$$p_3^{lms}(x, y, z, t) = \frac{1}{n_l n_m n_s} \sum_{i \in l} \sum_{j \in m} \sum_{g \in s} P_3^{ijg}(x, y, z, t), \quad (3.15)$$

$$p_3^{lls}(x, y, z, t) = \frac{1}{n_l(n_l - 1)n_s} \sum_{i \in l} \sum_{j \in l, j \neq i} \sum_{g \in s} P_3^{ijg}(x, y, z, t), \quad (3.16)$$

$$p_3^{lll}(x, y, z, t) = \frac{1}{n_l(n_l - 1)(n_l - 2)} \sum_{i \in l} \sum_{j \in l, j \neq i} \sum_{g \in l, g \neq i, j} P_3^{ijg}(x, y, z, t). \quad (3.17)$$

189 We therefore require a definition for the three particle PDF,  $P_3^{ijg}(x, y, z, t)$ ,  
190 similar to Equation (3.2),

$$P_3^{ijg}(x, y, z, t) = \langle \delta(x - x_i(t)) \delta(y - y_j(t)) \delta(z - z_g(t)) \rangle. \quad (3.18)$$

191 To proceed we divide Equation (3.14) by  $n_l(n_l - 1)$ , and combine Equations  
192 (3.14)-(3.18), summing over the indices  $i$  and  $j$ , to obtain an expression for  
193 the evolution of  $p_2^{ll}(x, y, t)$ ,

$$\begin{aligned} \frac{\partial p_2^{ll}(x, y, t)}{\partial t} = & D \Delta p_2^{ll}(x, y, t) \\ & - \frac{\partial}{\partial x} \left( F^{ll}(x - y) p_2^{ll}(x, y, t) \right) \\ & - \frac{\partial}{\partial y} \left( F^{ll}(y - x) p_2^{ll}(x, y, t) \right) \\ & - (n_l - 2) \frac{\partial}{\partial x} \int_{\Omega} F^{ll}(x - z) p_3^{lll}(x, y, z, t) dz \\ & - (n_l - 2) \frac{\partial}{\partial y} \int_{\Omega} F^{ll}(y - z) p_3^{lll}(x, y, z, t) dz \\ & - \sum_{k \neq l}^K n_k \frac{\partial}{\partial x} \int_{\Omega} F^{lk}(x - z) p_3^{llk}(x, y, z, t) dz \\ & - \sum_{k \neq l}^K n_k \frac{\partial}{\partial y} \int_{\Omega} F^{lk}(y - z) p_3^{llk}(x, y, z, t) dz. \end{aligned} \quad (3.19)$$

194 The total system of equations governing the evolution of the density-density  
195 correlation functions for  $K$  subpopulations consists of  $K$  equations in the  
196 form of Equation (3.19), and  $K!$  equations for the interspecies density-density  
197 correlation functions,  $p_2^{kl}(x, y, t)$ .

198 This procedure for deriving evolution equations for the density and density-  
199 density correlation functions can be repeated to yield a hierarchy of  $N - 1$

systems of IPDEs and a system of Fokker-Planck equations that govern the  $N$ -level density. At each level  $d$ , where  $d \in [1, N]$ , the  $d$ -density function  $p_d$  depends on the next order,  $p_{d+1}$ . This means that the full hierarchy of equations is, in general, both analytically and numerically intractable. Therefore, we must invoke some approximations to proceed, and we will now discuss two different approximations.

### 3.1.1 Mean field approximation

The simplest way to approximate the hierarchy is to truncate it at the first level by writing the density-density correlation function in terms of the one-cell density functions (Baker and Simpson, 2010),

$$p_2^{lm}(x, y, t) = p_1^l(x, t) p_1^m(y, t). \quad (3.20)$$

This approximation, often called the Mean Field Approximation (MFA), implies that the probability of finding one cell at  $[x, x + dx]$  at time  $t$  is independent of the probability of finding another cell at  $[y, y + dy]$  at the same time. MFA-based equations are, by far, the most popular way to describe collective cell migration (Sherratt and Murray, 1990; Painter and Sherratt, 2003; Maini et al., 2004).

We now present MFA equations for the cases relevant to both monoculture ( $K = 1$ ) and co-culture ( $K = 2$ ) experiments. First, for  $K = 1$ , substituting Equation (3.20) into Equation (3.10), we obtain

$$\frac{\partial p_1(x, t)}{\partial t} = D\Delta p_1(x, t) - (N - 1)\nabla(p_1(x, t) V(x, t)), \quad (3.21)$$

where

$$V(x, t) = \int_{\Omega} F(x - y) p_1(y, t) dy, \quad (3.22)$$

is the velocity field induced by interactions between cells. Second, for  $K = 2$ ,

the MFA leads to two coupled equations,

$$\begin{aligned} \frac{\partial p_1^1(x, t)}{\partial t} = & D\Delta p_1^1(x, t) - (n_1 - 1)\nabla\left(p_1^1(x, t) V^{11}(x, t)\right) \\ & - n_2\nabla\left(p_1^1(x, t) V^{12}(x, t)\right), \end{aligned} \quad (3.23)$$

$$\begin{aligned} \frac{\partial p_1^2(x, t)}{\partial t} = & D\Delta p_1^2(x, t) - (n_2 - 1)\nabla\left(p_1^2(x, t) V^{22}(x, t)\right) \\ & - n_1\nabla\left(p_1^2(x, t) V^{21}(x, t)\right), \end{aligned} \quad (3.24)$$

$$V^{lm}(x, t) = \int_{\Omega} F^{lm}(x - y) p_1^m(y, t) dy, \quad (3.25)$$

where indices  $l, m = 1, 2$ .

### 3.1.2 Moment dynamics approximation

A more sophisticated approach is to use a closure relation to write for the three-particle correlation function in terms of the two-particle correlation function (Baker and Simpson, 2010; Middleton et al., 2014). A commonly-used closure relations is the Kirkwood superposition approximation (KSA) (Kirkwood, 1935), which can be written as

$$p_3^{lms}(x, y, z, t) = \frac{p_2^{lm}(x, y, t) p_2^{ls}(x, z, t) p_2^{ms}(y, z, t)}{p_1^l(x, t) p_1^m(y, t) p_1^s(z, t)}, \quad (3.26)$$

where the subpopulations  $l, m$  and  $s$  are not necessarily distinct.

For monoculture experiments with  $K = 1$ , the KSA continuum model can be

231 written as

$$\frac{\partial p_1(x, t)}{\partial t} = D\Delta p_1(x, t) - (N - 1)\nabla \left( \int_{\Omega} F(x - y) p_2(x, y, t) dy \right), \quad (3.27)$$

$$\begin{aligned} \frac{\partial p_2(x, y, t)}{\partial t} = & D\Delta p_2(x, y, t) \\ & - \frac{\partial}{\partial x} \left( F(x - y) p_2(x, y, t) \right) \\ & - \frac{\partial}{\partial y} \left( F(y - x) p_2(x, y, t) \right) \\ & - (N - 2) \frac{\partial}{\partial x} \int_{\Omega} F(x - z) \frac{p_2(x, y, t) p_2(x, z, t) p_2(y, z, t)}{p_1(x, t) p_1(y, t) p_1(z, t)} dz \\ & - (N - 2) \frac{\partial}{\partial y} \int_{\Omega} F(y - z) \frac{p_2(x, y, t) p_2(x, z, t) p_2(y, z, t)}{p_1(x, t) p_1(y, t) p_1(z, t)} dz. \end{aligned} \quad (3.28)$$

232 It is useful to note that there is more than one way to solve a problem with  
233  $K = 1$  using the KSA framework. One approach would be to solve Equations  
234 (3.27) and (3.28) simultaneously. However, it is more computationally efficient  
235 to solve Equation (3.28) to give  $p_2(x, y, t)$ , and then to obtain  $p_1(x, t)$  by  
236 numerical integration

$$p_1(x, t) = \int_{\Omega} p_2(x, y, t) dy. \quad (3.29)$$

237 For co-culture experiments with  $K = 2$ , the KSA continuum model can be  
238 written as

$$\begin{aligned} \frac{\partial p_1^1(x, t)}{\partial t} = & D\Delta p_1^1(x, t) - (n_1 - 1)\nabla \left( \int_{\Omega} F^{11}(x - y) p_2^{11}(x, y, t) dy \right) \\ & - n_2 \nabla \left( \int_{\Omega} F^{12}(x - y) p_2^{12}(x, y, t) dy \right), \end{aligned} \quad (3.30)$$

$$\begin{aligned} \frac{\partial p_1^2(x, t)}{\partial t} = & D\Delta p_1^2(x, t) - (n_2 - 1)\nabla \left( \int_{\Omega} F^{22}(x - y) p_2^{22}(x, y, t) dy \right) \\ & - n_1 \nabla \left( \int_{\Omega} F^{21}(x - y) p_2^{21}(x, y, t) dy \right), \end{aligned} \quad (3.31)$$

$$\begin{aligned}
\frac{\partial p_2^{11}(x, y, t)}{\partial t} = & D\Delta p_2^{11}(x, y, t) \\
& - \frac{\partial}{\partial x} \left( F^{11}(x - y) p_2^{11}(x, y, t) \right) \\
& - \frac{\partial}{\partial y} \left( F^{11}(y - x) p_2^{11}(x, y, t) \right) \\
& - (n_1 - 2) \frac{\partial}{\partial x} \int_{\Omega} F^{11}(x - z) \frac{p_2^{11}(x, y, t) p_2^{11}(x, z, t) p_2^{11}(y, z, t)}{p_1^1(x, t) p_1^1(y, t) p_1^1(z, t)} dz \\
& - (n_1 - 2) \frac{\partial}{\partial y} \int_{\Omega} F^{11}(y - z) \frac{p_2^{11}(x, y, t) p_2^{11}(x, z, t) p_2^{11}(y, z, t)}{p_1^1(x, t) p_1^1(y, t) p_1^1(z, t)} dz \\
& - n_2 \frac{\partial}{\partial x} \int_{\Omega} F^{12}(x - z) \frac{p_2^{11}(x, y, t) p_2^{12}(x, z, t) p_2^{12}(y, z, t)}{p_1^1(x, t) p_1^1(y, t) p_1^2(z, t)} dz \\
& - n_2 \frac{\partial}{\partial y} \int_{\Omega} F^{12}(y - z) \frac{p_2^{11}(x, y, t) p_2^{12}(x, z, t) p_2^{12}(y, z, t)}{p_1^1(x, t) p_1^1(y, t) p_1^2(z, t)} dz,
\end{aligned} \tag{3.32}$$



$$\begin{aligned}
\frac{\partial p_2^{22}(x, y, t)}{\partial t} = & D\Delta p_2^{22}(x, y, t) \\
& - \frac{\partial}{\partial x} \left( F^{22}(x - y) p_2^{22}(x, y, t) \right) \\
& - \frac{\partial}{\partial y} \left( F^{22}(y - x) p_2^{22}(x, y, t) \right) \\
& - (n_2 - 2) \frac{\partial}{\partial x} \int_{\Omega} F^{22}(x - z) \frac{p_2^{22}(x, y, t) p_2^{22}(x, z, t) p_2^{22}(y, z, t)}{p_1^1(x, t) p_1^1(y, t) p_1^1(z, t)} dz \\
& - (n_2 - 2) \frac{\partial}{\partial y} \int_{\Omega} F^{22}(y - z) \frac{p_2^{22}(x, y, t) p_2^{22}(x, z, t) p_2^{22}(y, z, t)}{p_1^1(x, t) p_1^1(y, t) p_1^1(z, t)} dz \\
& - n_1 \frac{\partial}{\partial x} \int_{\Omega} F^{21}(x - z) \frac{p_2^{22}(x, y, t) p_2^{21}(x, z, t) p_2^{21}(y, z, t)}{p_1^1(x, t) p_1^1(y, t) p_1^2(z, t)} dz \\
& - n_1 \frac{\partial}{\partial y} \int_{\Omega} F^{21}(y - z) \frac{p_2^{22}(x, y, t) p_2^{21}(x, z, t) p_2^{21}(y, z, t)}{p_1^1(x, t) p_1^1(y, t) p_1^2(z, t)} dz,
\end{aligned} \tag{3.33}$$

$$\begin{aligned}
\frac{\partial p_2^{12}(x, y, t)}{\partial t} = & D\Delta p_2^{12}(x, y, t) \\
& - \frac{\partial}{\partial x} \left( F^{12}(x - y) p_2^{12}(x, y, t) \right) \\
& - \frac{\partial}{\partial y} \left( F^{12}(y - x) p_2^{12}(x, y, t) \right) \\
& - (n_2 - 1) \frac{\partial}{\partial x} \int_{\Omega} F^{12}(x - z) \frac{p_2^{12}(x, y, t) p_2^{12}(x, z, t) p_2^{22}(y, z, t)}{p_1^1(x, t) p_1^2(y, t) p_1^2(z, t)} dz \\
& - (n_1 - 1) \frac{\partial}{\partial x} \int_{\Omega} F^{11}(x - z) \frac{p_2^{12}(x, y, t) p_2^{11}(x, z, t) p_2^{21}(y, z, t)}{p_1^1(x, t) p_1^2(y, t) p_1^1(z, t)} dz \\
& - (n_1 - 1) \frac{\partial}{\partial y} \int_{\Omega} F^{21}(y - z) \frac{p_2^{12}(x, y, t) p_2^{11}(x, z, t) p_2^{21}(y, z, t)}{p_1^1(x, t) p_1^2(y, t) p_1^1(z, t)} dz \\
& - (n_2 - 1) \frac{\partial}{\partial y} \int_{\Omega} F^{22}(y - z) \frac{p_2^{12}(x, y, t) p_2^{12}(x, z, t) p_2^{22}(y, z, t)}{p_1^1(x, t) p_1^2(y, t) p_1^2(z, t)} dz,
\end{aligned} \tag{3.34}$$

$$\begin{aligned}
\frac{\partial p_2^{21}(x, y, t)}{\partial t} = & D\Delta p_2^{21}(x, y, t) \\
& - \frac{\partial}{\partial x} \left( F^{21}(x - y) p_2^{21}(x, y, t) \right) \\
& - \frac{\partial}{\partial y} \left( F^{21}(y - x) p_2^{21}(x, y, t) \right) \\
& - (n_1 - 1) \frac{\partial}{\partial y} \int_{\Omega} F^{21}(y - z) \frac{p_2^{21}(x, y, t) p_2^{21}(x, z, t) p_2^{11}(y, z, t)}{p_1^2(x, t) p_1^1(y, t) p_1^1(z, t)} dz \\
& - (n_2 - 1) \frac{\partial}{\partial y} \int_{\Omega} F^{22}(y - z) \frac{p_2^{21}(x, y, t) p_2^{22}(x, z, t) p_2^{12}(y, z, t)}{p_1^2(x, t) p_1^1(y, t) p_1^2(z, t)} dz \\
& - (n_2 - 1) \frac{\partial}{\partial x} \int_{\Omega} F^{12}(x - z) \frac{p_2^{21}(x, y, t) p_2^{22}(x, z, t) p_2^{12}(y, z, t)}{p_1^2(x, t) p_1^1(y, t) p_1^2(z, t)} dz \\
& - (n_1 - 1) \frac{\partial}{\partial x} \int_{\Omega} F^{11}(x - z) \frac{p_2^{21}(x, y, t) p_2^{21}(x, z, t) p_2^{11}(y, z, t)}{p_1^2(x, t) p_1^1(y, t) p_1^1(z, t)} dz.
\end{aligned} \tag{3.35}$$

239 Again, there are multiple strategies for solving the KSA equations when  $K = 2$ . Here, we solve Equations (3.32) and (3.33) to  
240 give  $p_2^{11}(x, y, t)$  and  $p_2^{22}(x, y, t)$ , respectively. Using these results we calculate  $p_1^1(x, t)$  and  $p_1^2(x, t)$  by numerical integration, similar  
241 to Equation (3.29). To obtain  $p_2^{12}(x, y, t)$  and  $p_2^{21}(x, y, t)$ , we use  $p_2^{12}(x, y, t) = p_1^1(x, t) p_1^2(y, t)$  and  $p_2^{21}(x, y, t) = p_1^2(x, t) p_1^1(y, t)$ ,  
242 respectively.

Now that we have documented both the MFA and KSA continuum approximations for both single species monoculture ( $K = 1$ ) and two-species co-culture ( $K = 2$ ) experiments, we will now solve these governing equations for both cases and compare results with averaged data from discrete simulations.

### 3.2 Application to monoculture experiments, $K = 1$

We first consider the situation where we have one population of cells,  $K = 1$ . In all of our numerical results we always fix the diffusivity to be  $D = 300 \mu\text{m}^2\text{h}^{-1}$  (Treloar et al. 2013). To emphasize the importance of non mean-field effects, all simulation results in the main paper involve strong adhesion, where  $f_0$  is sufficiently large. This situation is relevant when we apply our model to mimic the collective migration of epithelial cells (Treloar et al., 2013). In contrast, if the models are applied to deal with the collective migration of mesenchymal cells, without significant adhesion (Simpson et al., 2013), then additional results in the Supplementary Material document with reduced  $f_0$  are more relevant.

Since we consider unbiased random forces, we sample  $\xi_i$  from a Gaussian distribution with zero mean and zero auto-correlation

$$\langle \xi_i(t) \xi_j(t') \rangle = \frac{2D}{\Delta t} \delta_{ij} \delta_{tt'}, \quad (3.36)$$

which is a white noise limit (Supplementary Material). The variance of  $\xi_i$  is given by

$$\text{Var}(\xi_i) = \frac{2D}{\Delta t}, \quad (3.37)$$

where  $\Delta t$  is the duration of the time step used in the discrete simulations.

The initial distribution of cells in the monoculture simulations is given by

$$\alpha(x) = \begin{cases} 0, & 0 \mu\text{m} \leq x < 600 \mu\text{m}, \\ 25 \times 10^{-3}, & 600 \mu\text{m} \leq x \leq 1400 \mu\text{m}, \\ 0, & 1400 \mu\text{m} < x \leq 2000 \mu\text{m}, \end{cases} \quad (3.38)$$

on  $0 \leq x \leq 2000 \mu\text{m}$ , which is a typical length scale for an *in vitro* cell migration experiment (Jin et al. 2016). Here,  $\alpha(x)$  is a function of position, and we sample from this function to define the initial distribution of cells in the

discrete simulations. This initial distribution corresponds to a confined group of cells in the centre of the domain. When presenting results from simulations we refer to both the dimensional density of cells,  $p_1(x, t)$  [cells/ $\mu\text{m}$ ], as well as the non-dimensional density of cells relative to the carrying capacity density,  $p_1(x, t)/C$ , where  $C$  is the carrying capacity density that is given by  $C = N\delta/L$ , where  $N$  is the maximum number of cells of diameter  $\delta$  that can be distributed along a domain of length  $L$  without compression. Periodic boundary conditions are imposed for all simulations.

To solve the MFA model, we set  $p_1(x, 0) = \alpha(x)$ , and to solve the KSA model, we note that since cells are randomly placed according to Equation (3.38), there are no spatial correlations in the initial positions of the cells. Therefore, the initial conditions for the KSA model are given by  $p_1(x, 0) = \alpha(x)$  and  $p_2(x, y, 0) = \alpha(x)\alpha(y)$ . With this information, Equations (3.21) and (3.28) are solved using the method of lines with spatial and temporal discretisations chosen to be sufficiently fine that the numerical solutions are grid independent. The discrete model, Equation (2.3), is numerically integrated using a fourth order Runge-Kutta (RK4) method (Press et al., 2007) and density distributions are obtained by considering a large number of identically prepared simulations. Results in Figure 2 compare numerical solutions of the MFA and KSA continuum descriptions with averaged data from discrete simulations. Snapshots of the discrete simulations are shown in Figure 2(a)-(b). A comparison of the ensemble averaged data and the solution of the MFA and KSA models are given in Figure 2(c) and Figure 2(e), respectively. To clearly compare the performance of the MFA and KSA models near the position of the spreading profile, we show a magnified region of the profiles in Figures 2(d) and Figure 2(f).

In summary, we see that both the KSA and MFA models capture the overall spreading behaviour of the collective migration reasonably well, as shown in Figure 2(c) and Figure 2(e). However, when we examine the performance of MFA model more closely, as illustrated in Figure 2(d), we see that the solution of the MFA continuum model is not as steep as the discrete density data. In contrast, the performance of the KSA model, as shown in Figure 2(f), provides an improved match to the averaged discrete data. We now examine the relative performance of the MFA and KSA approaches for two multi-species problems.

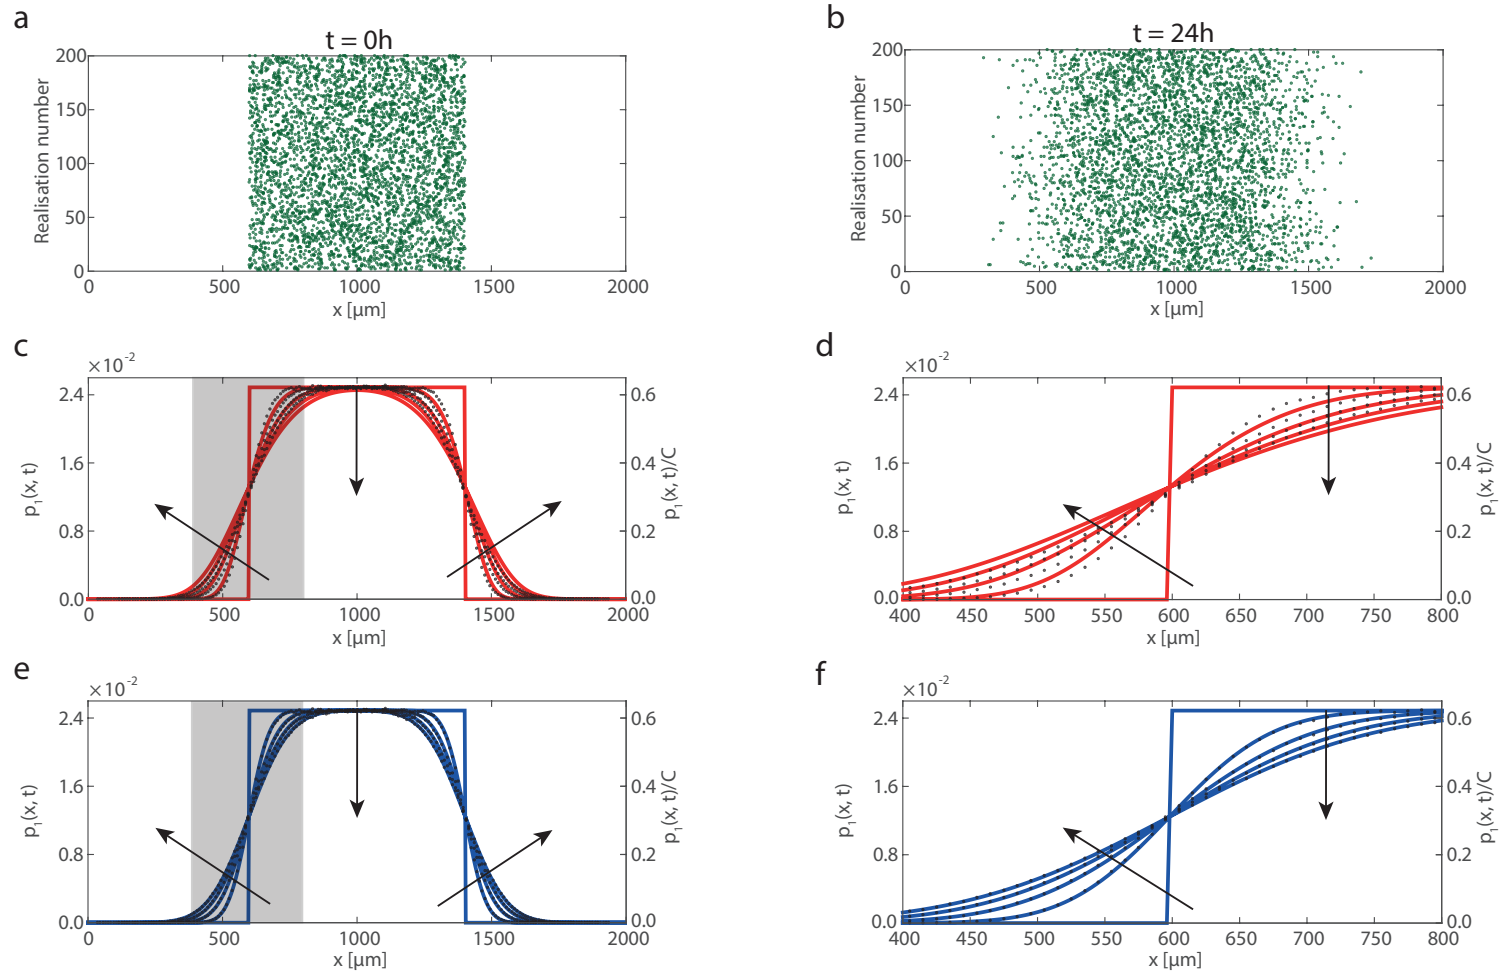

Fig. 2. Comparison of ensemble averages of stochastic simulations and solutions of the MFA and KSA continuum models for a single-species population of cells on a one-dimensional domain with  $0 \leq x \leq 2000 \mu\text{m}$ . Snapshots in (a)-(b) show 200 realisations of the discrete model at  $t = 0$  and  $t = 24$  hours, respectively. The population of cells (green) initially occupies the central region, which is  $800 \mu\text{m}$  wide, and has an initial density  $25 \times 10^{-3} \text{ cells}/\mu\text{m}$ . Results in (c)-(f) show the cell density profiles obtained using an ensemble of  $5 \times 10^5$  simulations (black dots) with binsize of  $10 \mu\text{m}$ . These results are compared to solutions of the MFA model, Equation (3.21) (red lines), and the KSA model, Equation (3.28) (blue lines). Profiles are given at  $t = 0, 6, 12, 18$ , and  $24$  h, with the arrows indicating the direction of increasing  $t$ . In (c)-(f) the cell density is reported in terms of the dimensional cell density,  $p_1(x, t)$ , as well as the dimensionless cell density,  $p_1(x, t)/C$ , where  $C = 40 \times 10^{-3} \text{ cells}/\mu\text{m}$ . Equation (2.3) is integrated with  $\Delta t = 5 \times 10^{-2} \text{ h}$ , Equation (3.21) is integrated with  $\Delta x = 4 \mu\text{m}$  and  $\Delta t = 10^{-2} \text{ h}$ , and Equation (3.28) is integrated with  $\Delta x = \Delta y = 4 \mu\text{m}$  and  $\Delta t = 10^{-2} \text{ h}$ . The remaining parameters are  $N = 20$ ,  $a = 0.08 \mu\text{m}^{-1}$ ,  $\delta = 25 \mu\text{m}$ ,  $f_0 = 0.2 \mu\text{m}/\text{h}$ .

### 3.3 Application to co-culture experiments, $K = 2$

We now consider the evolution of two types of two-species problems. These two problems involve different experimental designs. In both cases we choose the size of the cells in subpopulations 1 and 2 to be different. Here, the diameter of cells in the first subpopulation is  $\delta_1 = 18 \mu\text{m}$ , and the diameter of cells in the second subpopulation is  $\delta_2 = 25 \mu\text{m}$ . We also introduce differing interspecies interaction parameters such as the interspecies force amplitude,  $f_0^{12}$ , shape parameter,  $a_{12}$ , and the interspecies diameter,  $\delta_{12}$ , which corresponds to the average radius of the different cell types.

The first experiment involves one population of cells spreading through another background population of cells, and this mimics the way that an initially confined population of tumour cells might spread through surrounding healthy tissue (Eves et al. 2003). To specify the initial condition for this problem we must describe the initial location of both subpopulations,

$$\alpha_1(x) = \begin{cases} 0, & 0 \mu\text{m} \leq x < 600 \mu\text{m}, \\ 25 \times 10^{-3}, & 600 \mu\text{m} \leq x \leq 1400 \mu\text{m}, \\ 0, & 1400 \mu\text{m} < x \leq 2000 \mu\text{m}, \end{cases} \quad (3.39)$$

$$\alpha_2(x) = \begin{cases} 10.8 \times 10^{-3}, & 0 \mu\text{m} \leq x < 600 \mu\text{m}, \\ 0, & 600 \mu\text{m} \leq x \leq 1400 \mu\text{m}, \\ 10.8 \times 10^{-3}, & 1400 \mu\text{m} < x \leq 2000 \mu\text{m}, \end{cases} \quad (3.40)$$

where  $\alpha_1(x)$  is a function of position that describes the initial location of cells from the first subpopulation, and  $\alpha_2(x)$  is a function of position that describes the initial location of cells from the second subpopulation. This initial condition corresponds to the situation where the region  $600 \leq x \leq 1400 \mu\text{m}$  is relatively densely occupied by subpopulation 1, and the remaining space is less densely populated by subpopulation 2. To initialise the discrete simulations we sample from  $\alpha_1(x)$  and  $\alpha_2(x)$ , and snapshots showing 200 realisations of discrete model are given in Figure 3(a)-(c) at  $t = 0, 12$  and  $24$  hours, showing how the two subpopulations mix.

The second experiment that we consider corresponds to two initially adjacent subpopulations of cells. The initial location of both subpopulations is given

327 by

$$\alpha_1(x) = \begin{cases} 0, & 0 \mu\text{m} \leq x < 600 \mu\text{m}, \\ 25 \times 10^{-3}, & 600 \mu\text{m} \leq x < 1000 \mu\text{m}, \\ 0, & 1000 \mu\text{m} < x \leq 2000 \mu\text{m}, \end{cases} \quad (3.41)$$

328

$$\alpha_2(x) = \begin{cases} 0, & 0 \mu\text{m} \leq x < 1000 \mu\text{m}, \\ 25 \times 10^{-3}, & 1000 \mu\text{m} \leq x \leq 1400 \mu\text{m}, \\ 0, & 1400 \mu\text{m} < x \leq 2000 \mu\text{m}. \end{cases} \quad (3.42)$$

329 To initialise the discrete simulations we sample from  $\alpha_1(x)$  and  $\alpha_2(x)$ , and  
 330 snapshots showing 200 realisations of discrete model for the second initial  
 331 condition are given in Figure 5(a)-(c) at  $t = 0, 12$  and  $24$  hours. Here we see  
 332 that the two subpopulations mix near  $x = 1000 \mu\text{m}$ . Furthermore, we also see  
 333 that both subpopulations spread into the initially vacant surrounding regions.

334 To obtain continuum results for the two-species problems, the MFA and KSA  
 335 continuum models, given by Equations (3.23)-(3.24) and Equations (3.32)-  
 336 (3.33), respectively, are solved using the method of lines with spatial and  
 337 temporal discretisations chosen to be sufficiently fine that the numerical solu-  
 338 tions are grid independent (Supplementary Material). Results in Figures 3 and  
 339 5 compare the performance of the MFA approach with the averaged discrete  
 340 data. Since these simulations involve significant interaction forces, we see that  
 341 the solution of the MFA model does not always accurately capture the details  
 342 of how the subpopulations spread and interact with each other. Results in  
 343 Figures 4 and 6 compare the performance of the KSA approach with the aver-  
 344 aged discrete data. Comparing the performance of the KSA and MFA models  
 345 confirms that, similar to our results for the single-species problem in Figure  
 346 2, the KSA approach outperforms the MFA model.

### 347 3.4 Parameter sensitivity

348 In this section we investigate how the accuracy of the both continuum ap-  
 349 proximations depends on the choice of the model parameters. To explore this  
 350 question we re-examine the results of the first co-culture experiment, as il-  
 351 lustrated in Figures 3-4, and we quantify how the accuracy of the KSA and  
 352 MFA continuum models depends on the strength of adhesion and the ratio



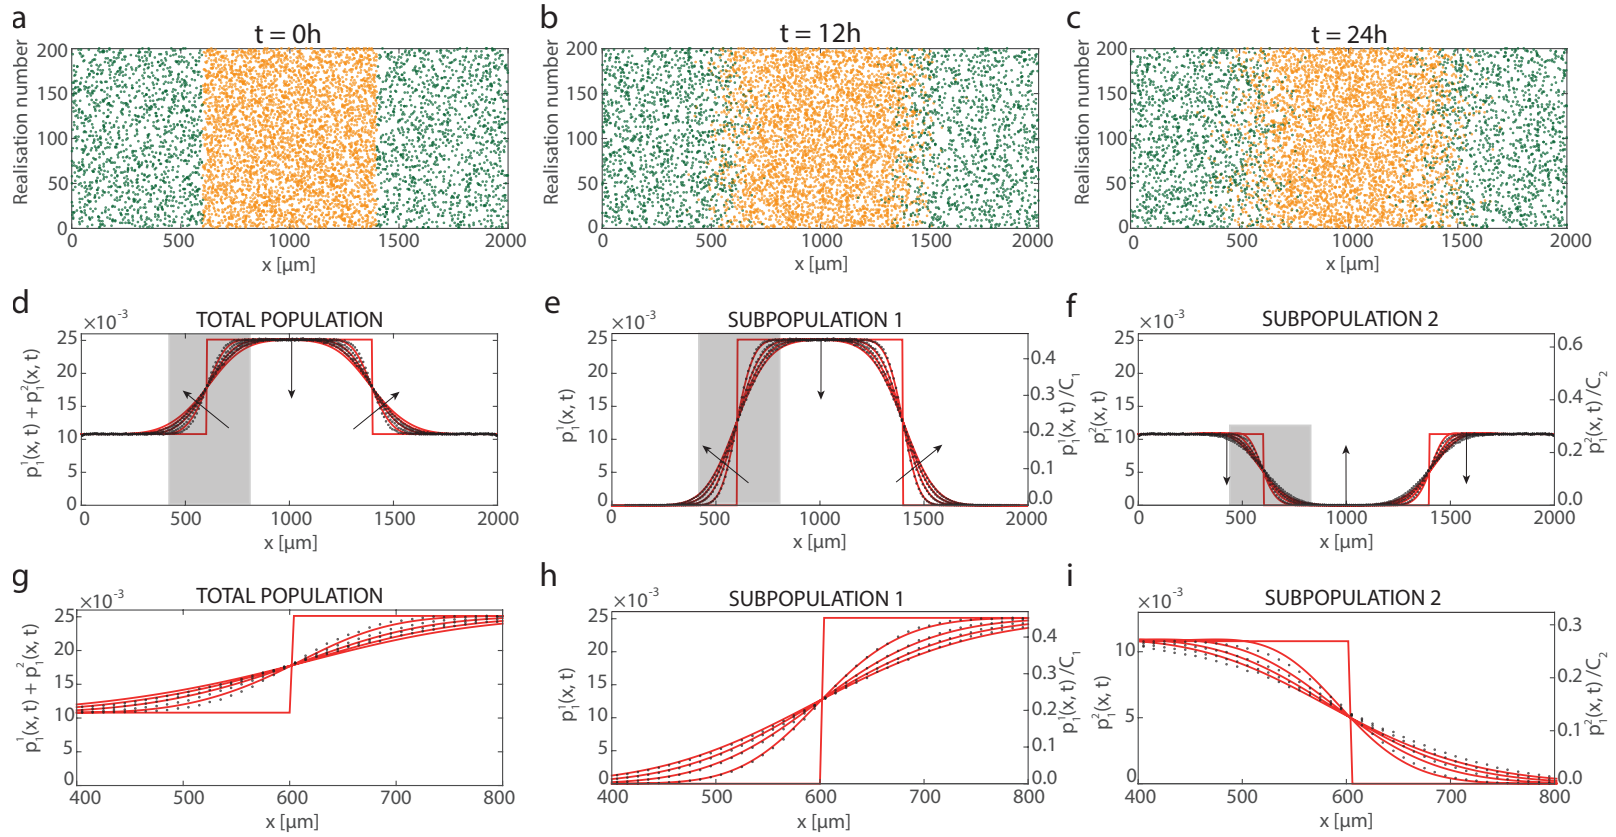

Fig. 3. Comparison of ensemble averages of stochastic simulations and solutions of the MFA continuum model, given by Equations (3.23)-(3.24), for a two-species population of cells on a one-dimensional domain with  $0 \leq x \leq 2000 \mu\text{m}$ . Snapshots in (a)-(c) show 200 realisations of the discrete model at  $t = 0, 12$ , and  $24$  hours, respectively. Subpopulation 1 (orange) initially occupies the central region at a density of  $25 \times 10^{-3}$  cells/ $\mu\text{m}$ , and subpopulation 2 (green) initially occupies two outer regions at a density of  $10.8 \times 10^{-3}$  cells/ $\mu\text{m}$ . Results in (d)-(i) show the density profiles obtained using an ensemble of  $5 \times 10^5$  simulations (black dots) with binsize of  $10 \mu\text{m}$ , and the solutions of the MFA model (red lines) at  $t = 0, 6, 12, 18$  and  $24$  h, with the arrows indicating the direction of increasing  $t$ . Results in (d)-(i) are shown in terms of the total population density, the density of subpopulation 1, and the density of subpopulation 2, as indicated. Density profiles are reported in terms of the dimensional cell densities,  $p_1^1(x, t)$  and  $p_1^2(x, t)$ , as well as the dimensionless cell densities,  $p_1^1(x, t)/C_1$  and  $p_1^2(x, t)/C_2$ , where  $C_1 = 55.5 \times 10^{-3}$  cells/ $\mu\text{m}$ ,  $C_2 = 40 \times 10^{-3}$  cells/ $\mu\text{m}$ . The MFA model is integrated with  $\Delta x = 4 \mu\text{m}$  and  $\Delta t = 5 \times 10^{-3}$  h. The remaining parameters are  $n_1 = 20$ ,  $n_2 = 13$ ,  $a_1 = 0.08 \mu\text{m}^{-1}$ ,  $a_2 = 0.06 \mu\text{m}^{-1}$ ,  $a_{12} = 0.07 \mu\text{m}^{-1}$ ,  $\delta_1 = 18 \mu\text{m}$ ,  $\delta_2 = 25 \mu\text{m}$ ,  $\delta_{12} = 21.5 \mu\text{m}$ ,  $f_0^{11} = 1.5 \mu\text{m/h}$ ,  $f_0^{22} = 1 \mu\text{m/h}$ ,  $f_0^{12} = 1.25 \mu\text{m/h}$ .

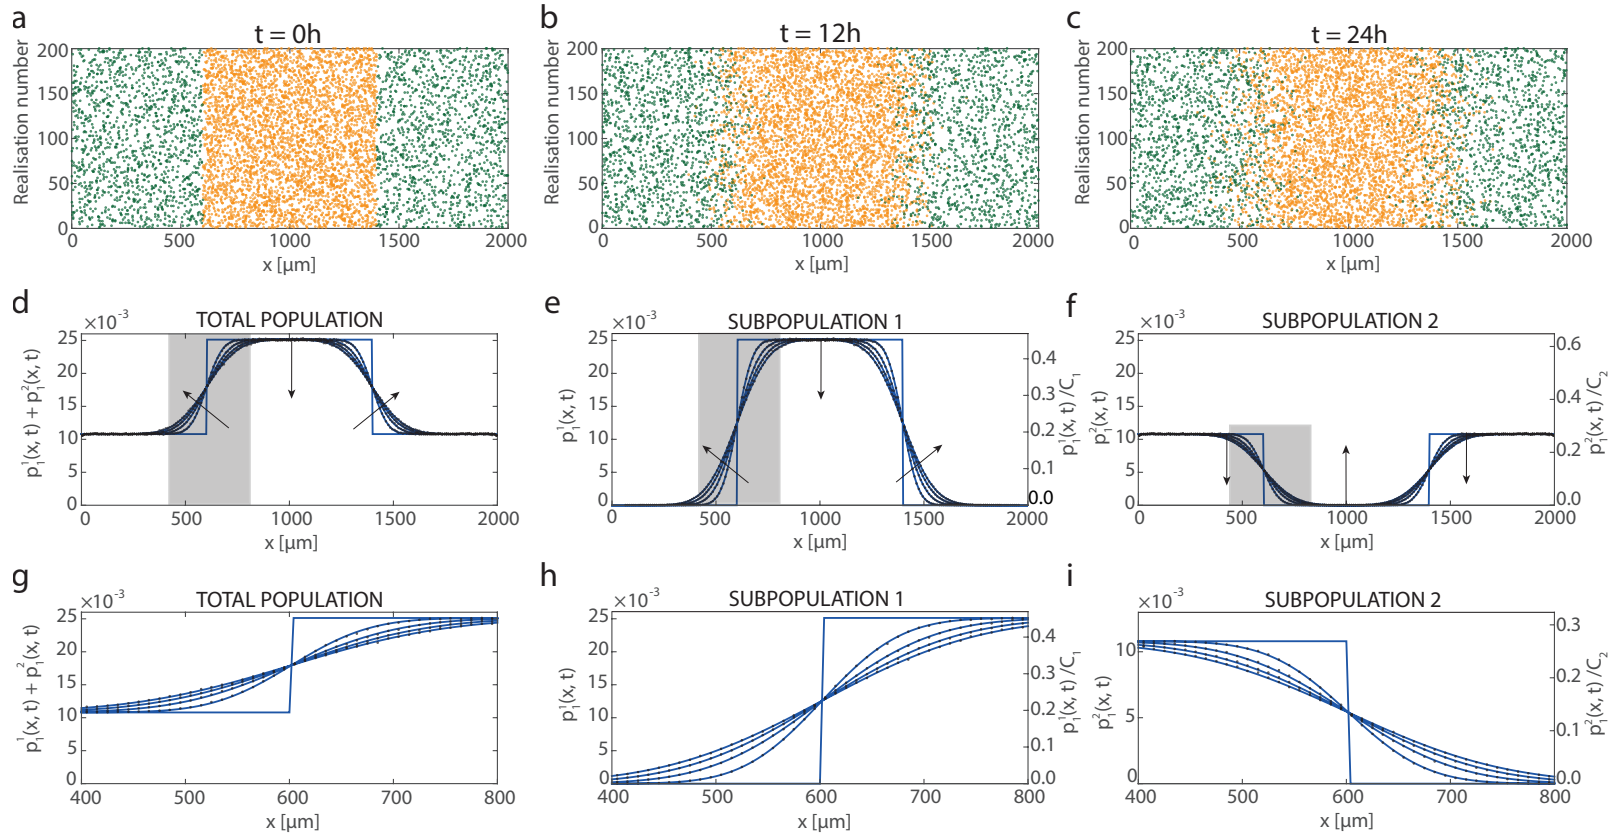

Fig. 4. Comparison of ensemble averages of stochastic simulations and solutions of the KSA continuum model, given by Equations (3.32)-(3.33), for a two-species population of cells on a one-dimensional domain with  $0 \leq x \leq 2000 \mu\text{m}$ . Snapshots in (a)-(c) show 200 realisations of the discrete model at  $t = 0, 12$ , and  $24$  hours, respectively. Subpopulation 1 (orange) initially occupies the central region at a density of  $25 \times 10^{-3}$  cells/ $\mu\text{m}$ , and subpopulation 2 (green) initially occupies two outer regions at a density of  $10.8 \times 10^{-3}$  cells/ $\mu\text{m}$ . Results in (d)-(i) show the density profiles obtained using an ensemble of  $5 \times 10^5$  simulations (black dots) with binsize of  $10 \mu\text{m}$ , and the solutions of the KSA model (red lines) at  $t = 0, 6, 12, 18$  and  $24$  h, with the arrows indicating the direction of increasing  $t$ . Results in (d)-(i) are shown in terms of the total population density, the density of subpopulation 1 and the density of subpopulation 2, as indicated. Density profiles are reported in terms of the dimensional cell densities,  $p_1^1(x, t)$  and  $p_1^2(x, t)$ , as well as the dimensionless cell densities,  $p_1^1(x, t)/C_1$  and  $p_1^2(x, t)/C_2$ , where  $C_1 = 55.5 \times 10^{-3}$  cells/ $\mu\text{m}$ ,  $C_2 = 40 \times 10^{-3}$  cells/ $\mu\text{m}$ . The KSA model is integrated with  $\Delta x = \Delta y = 4 \mu\text{m}$  and  $\Delta t = 5 \times 10^{-3}$  h. The remaining parameters are  $n_1 = 20$ ,  $n_2 = 13$ ,  $a_1 = 0.08 \mu\text{m}^{-1}$ ,  $a_2 = 0.06 \mu\text{m}^{-1}$ ,  $a_{12} = 0.07 \mu\text{m}^{-1}$ ,  $\delta_1 = 18 \mu\text{m}$ ,  $\delta_2 = 25 \mu\text{m}$ ,  $\delta_{12} = 21.5 \mu\text{m}$ ,  $f_0^{11} = 1.5 \mu\text{m/h}$ ,  $f_0^{22} = 1 \mu\text{m/h}$ ,  $f_0^{12} = 1.25 \mu\text{m/h}$ .

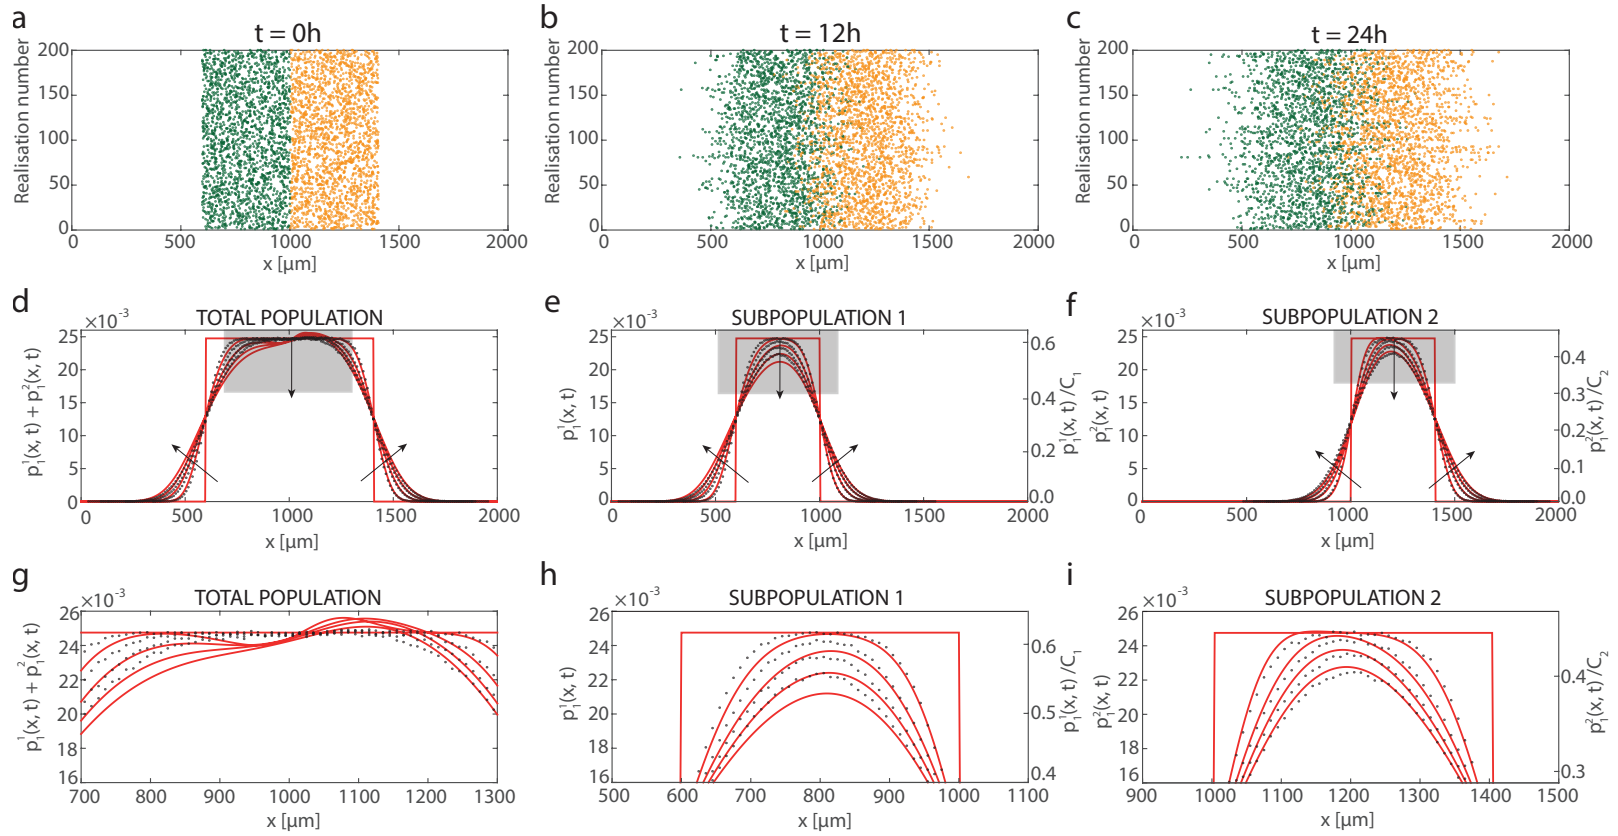

Fig. 5. Comparison of ensemble averages of stochastic simulations and solution of the MFA continuum model, given by Equations (3.23)-(3.24), for a two-species population of cells on a one-dimensional domain with  $0 \leq x \leq 2000 \mu\text{m}$ . Snapshots in (a)-(c) show 200 realisations of the discrete model at  $t = 0, 12$ , and  $24$  hours, respectively. Subpopulations 1 (green) and 2 (orange) initially occupy adjacent regions at a density of  $25 \times 10^{-3}$  cells/ $\mu\text{m}$ . Results in (d)-(i) show the density profiles obtained using an ensemble of  $5 \times 10^5$  simulations (black dots) with binsize of  $10 \mu\text{m}$ , and the solutions of the MFA model (red lines) at  $t = 0, 6, 12, 18$  and  $24$  h, with the arrows indicating the direction of increasing  $t$ . Results in (d)-(i) are shown in terms of the total population density, the density of subpopulation 1 and the density of subpopulation 2, as indicated. Density profiles are reported in terms of the dimensional cell densities,  $p_1^1(x, t)$  and  $p_1^2(x, t)$ , as well as the dimensionless cell densities,  $p_1^1(x, t)/C_1$  and  $p_1^2(x, t)/C_2$ , where  $C_1 = 40 \times 10^{-3}$  cells/ $\mu\text{m}$ ,  $C_2 = 55.5 \times 10^{-3}$  cells/ $\mu\text{m}$ . The MFA model is integrated with  $\Delta x = 4 \mu\text{m}$  and  $\Delta t = 5 \times 10^{-3}$  h. The remaining parameters are  $n_1 = 10$ ,  $n_2 = 10$ ,  $a_1 = 0.06 \mu\text{m}^{-1}$ ,  $a_2 = 0.08 \mu\text{m}^{-1}$ ,  $a_{12} = 0.07 \mu\text{m}^{-1}$ ,  $\delta_1 = 25 \mu\text{m}$ ,  $\delta_2 = 18 \mu\text{m}$ ,  $\delta_{12} = 21.5 \mu\text{m}$ ,  $f_0^{11} = 1.5 \mu\text{m/h}$ ,  $f_0^{22} = 2 \mu\text{m/h}$ ,  $f_0^{12} = 1.75 \mu\text{m/h}$ .

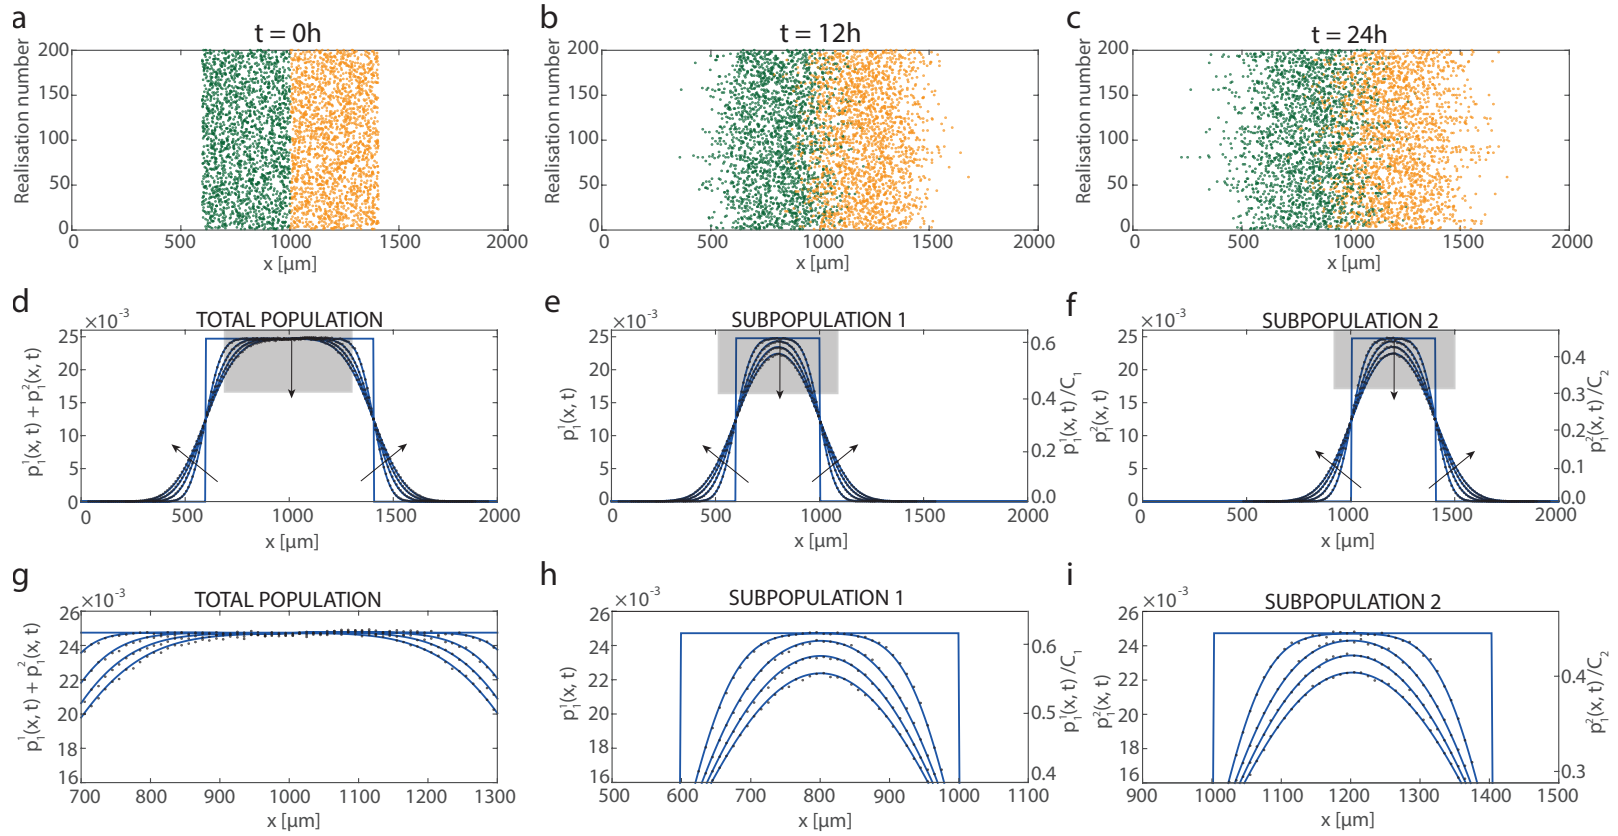

Fig. 6. Comparison of ensemble averages of stochastic simulations and solutions of the KSA continuum model, given by Equations (3.32)-(3.33), for a two-species population of cells on a one-dimensional domain with  $0 \leq x \leq 2000 \mu\text{m}$ . Snapshots in (a)-(c) show 200 realisations of the discrete model at  $t = 0, 12$ , and  $24$  hours, respectively. Subpopulations 1 (green) and 2 (orange) initially occupy adjacent regions at a density of  $25 \times 10^{-3}$  cells/ $\mu\text{m}$ . Results in (d)-(i) show the density profiles obtained using an ensemble of  $5 \times 10^5$  simulations (black dots) with binsize of  $10 \mu\text{m}$ , and the solutions of the KSA Equations (blue lines) at  $t = 0, 6, 12, 18$  and  $24$  h, with the arrows indicating the direction of increasing  $t$ . Results in (d)-(i) are shown in terms of the total population density, the density of subpopulation 1 and the density of subpopulation 2, as indicated. Density profiles are reported in terms of the dimensional cell densities,  $p_1^1(x, t)$  and  $p_1^2(x, t)$ , as well as the dimensionless cell densities,  $p_1^1(x, t)/C_1$  and  $p_1^2(x, t)/C_2$ , where  $C_1 = 40 \times 10^{-3}$  cells/ $\mu\text{m}$ ,  $C_2 = 55.5 \times 10^{-3}$  cells/ $\mu\text{m}$ . The KSA model is integrated with  $\Delta x = \Delta y = 4 \mu\text{m}$  and  $\Delta t = 5 \times 10^{-3}$  h. The remaining parameters are  $n_1 = 10$ ,  $n_2 = 10$ ,  $a_1 = 0.06 \mu\text{m}^{-1}$ ,  $a_2 = 0.08 \mu\text{m}^{-1}$ ,  $a_{12} = 0.07 \mu\text{m}^{-1}$ ,  $\delta_1 = 25 \mu\text{m}$ ,  $\delta_2 = 18 \mu\text{m}$ ,  $\delta_{12} = 21.5 \mu\text{m}$ ,  $f_0^{11} = 1.5 \mu\text{m/h}$ ,  $f_0^{22} = 2 \mu\text{m/h}$ ,  $f_0^{12} = 1.75 \mu\text{m/h}$ .



of the two cell sizes in the co-culture experiment. To explore this we repeat the discrete simulations and vary the force amplitude  $f_0^{11}$ , which determines strength of the cell-to-cell adhesion, as well as varying the ratio  $\delta_1/\delta_2$ . To keep our analysis as straightforward as possible, we vary these two quantities separately.

To quantify the accuracy of both the MFA and KSA continuum approximations we define the following quantities,

$$E_{\text{MFA}}(t) = \frac{1}{I} \sum_{i=1}^I [S_{\text{MFA}}(i, t) - S_{\text{discrete}}(i, t)]^2, \quad (3.43)$$

$$E_{\text{KSA}}(t) = \frac{1}{I} \sum_{i=1}^I [S_{\text{KSA}}(i, t) - S_{\text{discrete}}(i, t)]^2, \quad (3.44)$$

where  $E_{\text{MFA}}(t)$  and  $E_{\text{KSA}}(t)$  indicate mean squared error associated with the MFA and KSA approximations, respectively. The index  $i$  denotes the spatial node, and  $I = 200$  is the total number of spatial nodes across the domain. To construct these mean squared errors we compare the total density profiles so that  $S_{\text{MFA}}(i, t) = p_1^1(i, t) + p_1^2(i, t)$  is the total population density predicted by the MFA continuum approximation,  $S_{\text{KSA}}(i, t) = p_1^1(i, t) + p_1^2(i, t)$  is the total population density predicted by the KSA continuum approximation, and  $S_{\text{discrete}}(i, t) = p_1^1(i, t) + p_1^2(i, t)$  is the total population density obtained by considering an ensemble average of the discrete model.

Results in Figure 7 show  $E_{\text{MFA}}(t)$  and  $E_{\text{KSA}}(t)$  as a function of  $\delta_1/\delta_2$  and  $f_0^{11}$ . The vertical lines correspond to choices of  $\delta_1/\delta_2$  and  $f_0^{11}$  that are identical to the parameter values used to construct the results in Figures 3-4. Overall, the results in Figure 7 show three main trends: (i) for all parameter choices considered in the sensitivity analysis, the KSA approximation outperforms the MFA approximation; (ii) the accuracy of both the MFA and KSA approximations decrease with both  $\delta_1/\delta_2$  and  $f_0^{11}$ ; and (iii) the accuracy of both the MFA and KSA approximations is more sensitive to changes in  $\delta_1/\delta_2$  than changes in  $f_0^{11}$  for the range of parameters considered.

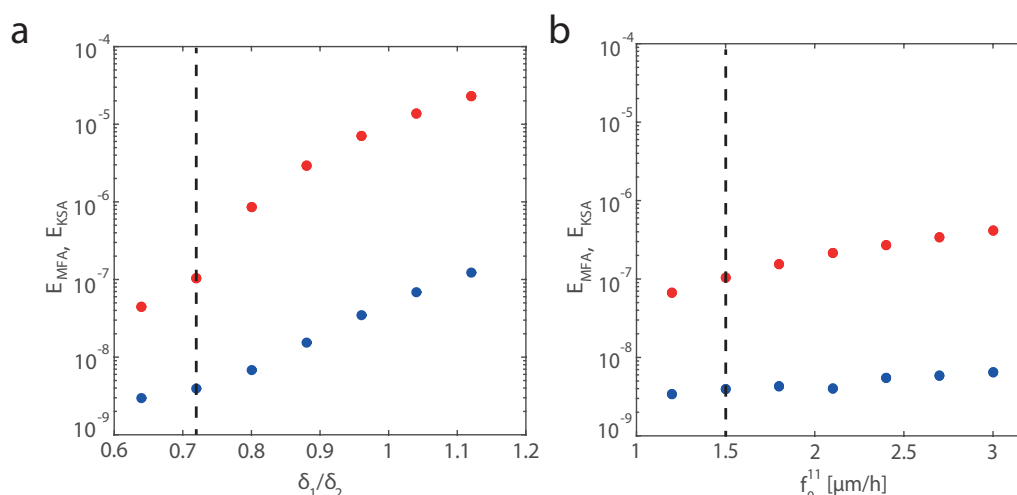

Fig. 7. (a) Comparison of the accuracy of the MFA and KSA continuum approximations as a function of  $\delta_1/\delta_2$  at time  $t = 24$  h for the first co-culture experiment. All results in (a) correspond to  $\delta_2 = 25 \mu\text{m}$ , and the ratio  $\delta_1/\delta_2$  is varied by altering  $\delta_1$ . (b) Comparison of the accuracy of the MFA and KSA continuum approximations as a function of  $f_0^{11}$  at time  $t = 24$  h for the first co-culture experiment. All data in (b) correspond to a fixed choice of  $f_0^{22} = 1.0 \mu\text{m/h}$ . Both subfigures show  $E_{MFA}(t)$  (red dots) and  $E_{KSA}(t)$  (blue dots), and the dashed vertical line indicates the parameter values presented previously in Figures 3-4. All continuum models are solved numerically with  $\Delta x = 4 \mu\text{m}$  and  $\Delta t = 5 \times 10^{-3}$  h.

## 378 4 Conclusions

379 In this work, we develop a discrete multi-species model of collective cell migra-  
 380 tion. Our framework is very general, and can deal with genuine multi-species  
 381 problems where the subpopulations are distinct (Eves et al., 2003), as well  
 382 as other types of experiments where an otherwise identical subpopulation of  
 383 cells is labelled (Simpson et al., 2007). Our discrete modelling framework can  
 384 include various effects such as: random unbiased stochastic motion of individ-  
 385 ual cells; short range finite size effects to account for crowding interactions;  
 386 longer range adhesive forces; as well as dealing with subpopulations of cells  
 387 that have different cell diameters.

388 To analyse the discrete model, we derive a hierarchy of continuum moment  
 389 equations to describe the spatial dynamics of agents, pairs of agents, triplets  
 390 of agents, and so forth. We then develop two different approximate solutions  
 391 of the hierarchy of moment equations. Firstly, using the MFA, and secondly,

392 using the KSA. We compare both continuum approximations with ensemble  
393 averages from discrete simulations.

394 Overall, both continuum approximations match the broad features of the dis-  
395 crete results reasonably well. When there is little or no adhesion, both contin-  
396 uum models match the averaged discrete results extremely well. However, once  
397 the adhesive force is sufficiently strong, the KSA continuum model matches  
398 the averaged discrete results much better than MFA model. This difference  
399 is the consequence of adhesion causing correlations in the positions of agents  
400 in the discrete simulations (Baker and Simpson, 2010). These effects are ne-  
401 glected in the MFA model, however the KSA model explicitly includes the  
402 effects of pairwise correlations,  $p_2(x, y, t)$ .

403 There are many potential extensions which we leave for future analysis. All  
404 our analysis has been in one dimension, but many biological experiments are  
405 in two or three dimensions (Treloar et al., 2013; Eves et al., 2003). It is rela-  
406 tively straightforward to apply our continuum models to higher dimensional  
407 problems, however we choose to take the most fundamental approach here  
408 and focus on one dimension only. As it stands, isolated individual cells in  
409 our discrete model move due to unbiased random motion. However, in many  
410 applications cells move with a bias, such as in chemotaxis (Keller and Segel,  
411 1971). To extend our model to deal with chemotaxis we would need to intro-  
412 duce an evolution equation for some kind of nutrient, and to allow individual  
413 cells to move with some bias in response to the spatial gradient of the nutrient  
414 (Keller and Segel, 1971). We also note that all non-MFA results are obtained  
415 by approximately closing the system of continuum equations using the KSA,  
416 however other kinds of closure relations could also be used (Murrell et al.,  
417 2004; Frasca and Sharkey, 2016).

## 418 Acknowledgements

419 This work is supported by the Australian Research Council (FT130100148,  
420 DP170100474). Computational resources are provided by the High Perfor-  
421 mance Computing and Research Support Group at QUT. We appreciate the  
422 helpful comments and suggestions from the referee.

## References

- [1] Baker RE, Simpson MJ (2010). Correcting mean-field approximations for birth-death-movement processes. *Physical Review E*. 82: 041905.
- [2] Binder BJ, Simpson MJ (2016). Cell density and cell size dynamics during *in vitro* tissue growth experiments: Implications for mathematical models of collective cell behaviour. *Applied Mathematical Modelling*. 40: 3438-3446.
- [3] Eves P, Katerinaki E, Simpson C, Layton C, Dawson R, Evans G, MacNeil S (2003). Melanoma invasion in reconstructed human skin is influenced by skin cells – investigation of the role of proteolytic enzymes. *Clinical & Experimental Metastasis*. 20(8): 685-700.
- [4] Frasca M, Sharkey KJ (2016) Discrete-time moment closure models for epidemic spreading in populations of interacting individuals. *Journal of Theoretical Biology*. 399: 13-21.
- [5] Jeon J, Quaranta V, Cummings PT (2010). An off-lattice hybrid discrete-continuum model of tumor growth and invasion. *Biophysical Journal*. 98 (1): 37-47.
- [6] Jin W, Shah ET, Penington CJ, McCue SW, Chopin LK, Simpson MJ (2016). Reproducibility of scratch assays is affected by the initial degree of confluence: Experiments, modelling and model selection. *Journal of Theoretical Biology*. 390: 136-145.
- [7] Johnston ST, Simpson MJ, Baker RE (2015). Modelling the movement of interacting cell populations: A moment dynamics approach. *Journal of Theoretical Biology*. 370: 81-92.
- [8] Keller EF, Segel LA (1971). Traveling bands of chemotactic bacteria: a theoretical analysis. *Journal of Theoretical Biology*. 30:235.
- [9] Kirkwood JG (1935). Statistical mechanics of fluid mixtures. *Journal of Chemical Physics*. 3 (5): 300-313.
- [10] Maini PK, McElwain DL, Leavesley DI (2004). Traveling wave model to interpret a wound-healing cell migration assay for human peritoneal mesothelial cells. *Tissue Engineering*. 10 (3-4): 475-82.
- [11] Middleton AM, Fleck C, Grima R (2014). A continuum approximation to an off-lattice individual-cell based model of cell migration and adhesion. *Journal of Theoretical Biology*. 359: 220-232.



- 456 [12] Murrell DJ, Dieckmann U, Law R (2004). On moment closures for population  
457 dynamics in continuous space. *Journal of Theoretical Biology*. 229: 421-432.
- 458 [13] Murray PJ, Edwards CM, Tindall MJ, Maini PK (2009). From a discrete to a  
459 continuum model of cell dynamics in one dimension. *Physical Review E*. 80 (3):  
460 031912.
- 461 [14] Newman TJ, Grima R (2004). Many-body theory of chemotactic cell-cell  
462 interactions. *Physical Review E*. 70: 051916.
- 463 [15] Painter KJ, Sherratt JA (2003). Modelling the movement of interacting cell  
464 populations. *Journal of Theoretical Biology*. 225: 327-339.
- 465 [16] Penington CJ, Hughes BD, Landman KA (2011). Building macroscale models  
466 from microscale probabilistic models: A general probabilistic approach for  
467 nonlinear diffusion and multispecies phenomena. *Physical Review E*. 84: 041120.
- 468 [17] Press WH, Flannery BP, Teukolsky SA, Vetterling WT (2007). Numerical  
469 recipes: The art of scientific computing (3rd ed.). Cambridge University Press.  
470 Cambridge. UK.
- 471 [18] Sherratt JA, Murray JD (1990). Models of epidermal wound healing.  
472 *Proceedings of the Royal Society of London B*. 241: 29-36.
- 473 [19] Simpson MJ, Landman KA, Hughes BD, Newgreen DF (2006). Looking inside  
474 an invasion wave of cells using continuum models: Proliferation is the key. *Journal*  
475 *of Theoretical Biology*, 243: 343-360.
- 476 [20] Simpson MJ, Zhang DC, Landman KA, Newgreen DF (2007). Cell proliferation  
477 drives neural crest cell invasion of the intestine. *Developmental Biology*, 302: 553-  
478 568.
- 479 [21] Simpson MJ, Landman KA, Hughes BD (2009). Multi-species simple exclusion  
480 processes. *Physica A: Statistical Mechanics and its Applications*. 388: 399-406.
- 481 [22] Simpson MJ, Binder BJ, Haridas P, Wood BK, Treloar KK, McElwain  
482 DLS, Baker RE (2013). Experimental and modelling investigation of monolayer  
483 development with clustering. *Bulletin of Mathematical Biology*. 75: 871-889.
- 484 [23] Srinivas S, Rodriguez T, Clements M, Smith JC, Beddington RSP (2004).  
485 Active cell migration drives the unilateral movements of the anterior visceral  
486 endoderm. *Development*. 131 (5): 1157.
- 487 [24] Steinberg MS (1996). Adhesion in development: An historical review.  
488 *Developmental Biology*. 180: 377-388.

- 489 [25] Tersoff J (1987). New empirical approach for the structure and energy of  
490 covalent systems. *Physical Review B*. 37(12): 6991-7000.
- 491 [26] Treloar KK, Simpson MJ, Haridas P, Manton KJ, Leavesley DI, McElwain DLS,  
492 Baker RE (2013). Multiple types of data are required to identify the mechanisms  
493 influencing the spatial expansion of melanoma cell colonies. *BMC Systems Biology*.  
494 7:137.
- 495 [27] Van Kampen NG (1976). Stochastic differential equations. *Physics Reports*. 24c  
496 (3): 171-228.
- 497 [28] Weinberg RA (2009). *The biology of cancer*. Second edition. Garland Science.  
498 New York. USA.
